# Supplementary material for: Potential for the Integrated Production of Biojet Fuel in Swedish Plant Infrastructures
Source: MDPI journal article supplement (doi:10.3390/en14206531), 2021-10-12
Supplement: s1 [file s1]

Archive with 1 entries (1 files):
- energies-1393812-supplementary.pdf
