# Supplementary material for: Potential for the Integrated Production of Biojet Fuel in Swedish Plant Infrastructures
Source: MDPI journal article supplement (doi:10.3390/en14206531), 2021-10-12
Supplement: s1 [file s1 › energies-1393812-supplementary.pdf]

## Supplementary information to “The Potential for Integrated Production of Biojet Fuel in Swedish Plant Infrastructures”

**Table S1.** Summary of data for the cases and the estimated production potentials of biofuel intermediates and its system effects national level. The estimates were made scaling up the data for the cases to the total size of the identified eligible host industries.

| Integrated production pathway                              | Size reference for host industry | Data for the cases (PJ/y) |                     |                        |                             | Total size of eligible host industries | Estimates for the national level (PJ/y) |                       |                             |
|------------------------------------------------------------|----------------------------------|---------------------------|---------------------|------------------------|-----------------------------|----------------------------------------|-----------------------------------------|-----------------------|-----------------------------|
|                                                            |                                  | Size of host industry     | Net biomass input   | Net electricity input  | Output biofuel intermediate |                                        | Net biomass input                       | Net electricity input | Output biofuel intermediate |
| 1. Sawmill – Fast pyrolysis oil from sawdust (A)           | Sawn wood production             | 0.25 Mm <sup>3</sup> /y   | 0.34                | 0                      | 0.303                       | 11.0 Mm <sup>3</sup> /y                | 14.9                                    | 0                     | 13.4                        |
| 2. Sawmill – Ethanol from sawdust (B)                      | Sawn wood production             | 0.50 Mm <sup>3</sup> /y   | 1.38                | 0.12                   | 1.33 (+ 0.47) <sup>a</sup>  | 3.0 Mm <sup>3</sup> /y                 | 20.3                                    | 0.7                   | 8.0 (+ 2.8) <sup>a</sup>    |
| 3. CHP – Fast pyrolysis oil from forestry residues (A)     | Biomass input before retrofit    | 1.0 PJ/y                  | 0.97                | -0.003                 | 0.71                        | 59 PJ/y                                | 57.2                                    | -0.2                  | 41.9                        |
| 4. CHP – FT crude from forestry residues (B)               | Biomass input before retrofit    | 2.0 PJ/y                  | 0.58                | 0.46                   | 0.81                        | 37 PJ/y                                | 10.8                                    | 8.5                   | 14.9                        |
| 5. Kraft pulp mill-HTL crude from forestry residues (A, B) | Kraft pulp production            | 0.4 Mdt/y                 | 3.74 <sup>b</sup>   | 0.26 <sup>b</sup>      | 2.81                        | 4.7 Mdt/y                              | 43.9                                    | 3.1                   | 33.0                        |
| 6. Kraft pulp mill – Lignin oil from black liquor (A, B)   | Kraft pulp production            | 0.4 Mdt/y                 | 1.59/0 <sup>c</sup> | 0.05/0.35 <sup>c</sup> | 1.14                        | 4.7 Mdt/y                              | 9.3 <sup>d</sup>                        | 2.3 <sup>d</sup>      | 13.4                        |

<sup>a</sup>The number in parentheses refers other co-produced biofuels, including primarily to biogas and a small amount of methanol.

<sup>b</sup>Based on values for an integrated kraft pulp and paper mill.

<sup>c</sup>The numbers refer to an integrated and a non-integrated kraft pulp mill, respectively.

<sup>d</sup>Assuming half of the production takes place in an integrated kraft pulp mill and the remaining half in a non-integrated kraft pulp mill.

**Table S2.** Data behind Figure 9.

| Integrated production pathways         | Net biomass input | Output of refined products |          |                 |        |                | H <sub>2</sub> req. (total) | Electricity input required to meet 30-100 % of the hydrogen demand |      |      | Natural gas/biogas input required to meet 30-100 % of the hydrogen demand |      |      |
|----------------------------------------|-------------------|----------------------------|----------|-----------------|--------|----------------|-----------------------------|--------------------------------------------------------------------|------|------|---------------------------------------------------------------------------|------|------|
|                                        |                   | Refined output (total)     | Jet fuel | Naphtha/ petrol | Diesel | Heavy fuel oil |                             | 30%                                                                | 70%  | 100% | 30%                                                                       | 70%  | 100% |
| Combination A (pathways 1, 3, 5 and 6) | 125.3             | 90.2                       | 21.7     | 22.4            | 23.8   | 22.8           | 30.3                        | 12.7                                                               | 29.7 | 42.4 | 11.8                                                                      | 27.6 | 39.4 |
| Combination B (pathways 2, 4, 5 and 6) | 84.3              | 65.1                       | 22.6     | 12.5            | 17.6   | 12.8           | 9.2                         | 3.9                                                                | 9.0  | 12.9 | 3.6                                                                       | 8.4  | 12.0 |
